# Supplementary material for: EMT related circular RNA expression profiles identify circSCYL2 as a novel molecule in breast tumor metastasis
Source: PubMed Central journal article supplement — Int J Mol Med. 2020 Mar 24;45(6):1697–710. doi: 10.3892/ijmm.2020.4550 (PMC7169655; doi:10.3892/ijmm.2020.4550), 2020-03-24
Supplement: Supplementary_Data.pdf [file Supplementary_Data.pdf]

Table SI. Primer sequences used in this study.

| Gene           | Primer         | Sequences (5' to 3')      |
|----------------|----------------|---------------------------|
| Actin          | Actin-F        | AGCACAGAGCCTCGCCTTTG      |
|                | Actin-R        | CTTCTGACCCATGCCACCA       |
| E-cadherin     | E-cadherin-F   | CTGGCGTCTGTAGGAAGGCA      |
|                | E-cadherin-R   | GGGCAGTAAGGGCTCTTTGAC     |
| Vimentin       | Vimentin-F     | GCAATCTTTCAGACAGGATGTTG   |
|                | Vimentin-R     | TTCCTCTTCGTGGAGTTTCTCA    |
| GAPDH          | GAPDH-F        | AGAAGGCTGGGGCTCATT        |
|                | GAPDH-R        | TGCTAAGCAGTTGGTGGTG       |
| circ-MYO9A     | circ-MYO9A-F   | AATCCTGAAGTTCTGCCTATTGTCT |
| circ-DNAJC3    | circ-MYO9A-R   | TTCATTATCTTCAAAGCGTCGTCT  |
|                | circ-DNAJC3-F  | AGGATTTGCCACTGCTTTTCTAA   |
| circ-ANKRD12-F | circ-DNAJC3-R  | TGCTTCCTTTTCTTCATTTTCACT  |
|                | circ-ANKRD12-F | TTGGAGTTGCTACTAAAAAGAGAGG |
| circ-DEK       | circ-ANKRD12-R | TGTTTGTGATGGATGATTTGGTG   |
|                | circ-DEK-F     | AACTTGGAAGAAGTCACAATGAAAC |
| circ-SCYL2     | circ-DEK-R     | TTGTAAATGGCTCTCTCTGTAAGGA |
|                | circ-SCYL2-F   | CCTTCCCCTATATCTCCAGACATTA |
|                | circ-SCYL2-R   | GACAGGATTTCCCATTACAGCA    |

circ, circular; E, epithelial.
